# Supplementary material for: A Novel Isaindigotone Derivative Displays Better Anti-Proliferation Activities and Induces Apoptosis in Gastric Cancer Cells
Source: MDPI journal article supplement (doi:10.3390/ijms23148028), 2022-07-21

# Supplement Material

**A novel isaindigotone derivative displays better anti-proliferation activities and induces apoptosis in gastric cancer cells**

Kangjia Du<sup>#</sup>, Chengjie Yang<sup>#</sup>, Zhongkun Zhou, Yunhao Ma, Yanan Tian, Rentao Zhang, Hao Zhang, Xinrong Jiang, Hongmei Zhu, Huanxiang Liu, Peng Chen <sup>\*</sup>, Yingqian Liu<sup>\*</sup>  
School of Pharmacy, Lanzhou University, 199 Donggang West Road, Lanzhou, 730000, PR China.

The chemical atlas data of BLG26.

<sup>1</sup>H NMR, <sup>13</sup>C NMR, HRESIMS and HPLC Spectra of BLG26

BLG26 displays antiproliferative activity against SMMC-7721, PANC-1 and HCT116 cells.

BLG26 can get into AGS and HGC27 cells.

The yield was 69%. The m.p. was 231-233°C. Then, the NMR and ESI mass

---

<sup>#</sup> These authors contributed equally to this work.

<sup>\*</sup> Correspondence and requests for materials should be addressed to Peng Chen

(email: chenpeng@lzu.edu.cn) or Yingqian Liu (email: yqliu@lzu.edu.cn). Tel. & fax: +86 931 8915686.

spectrometry were analysed.  $^1\text{H}$  NMR (400 MHz, Chloroform-*d*)  $\delta$ : 7.76 (d,  $J$  = 12.9 Hz, 1H), 7.61 (d,  $J$  = 3.1 Hz, 1H), 7.32 - 7.24 (m, 1H), 7.23 - 7.12 (m, 2H), 7.08 (d,  $J$  = 7.8 Hz, 1H), 4.20 (t,  $J$  = 7.1 Hz, 2H), 3.24 (t,  $J$  = 4.8 Hz, 4H), 3.17 (d,  $J$  = 9.8 Hz, 2H), 2.56 (t,  $J$  = 4.9 Hz, 4H), 2.31 (s, 3H).  $^{13}\text{C}$  NMR (100 MHz, Chloroform-*d*)  $\delta$ : 159.11, 154.14 (d,  $J$  = 44.5 Hz), 151.88, 150.65 (d,  $J$  = 12.7 Hz), 148.16 (d,  $J$  = 16.1 Hz), 146.51, 145.35 (d,  $J$  = 10.0 Hz), 131.67, 126.89, 125.27, 117.06, 116.89, 116.73, 114.17 (d,  $J$  = 3.6 Hz), 113.51 (d,  $J$  = 8.4 Hz), 111.04 (d,  $J$  = 23.7 Hz), 53.89, 48.91 (d,  $J$  = 4.7 Hz), 45.09, 42.93, 24.38. Purity 99.5% by HPLC. HRESIMS-ESI  $m/z$ : calcd for  $\text{C}_{23}\text{H}_{21}\text{F}_3\text{N}_4\text{O}[\text{M}+\text{H}]^+$ : 427.1667; found: 427.1769.

**Figure S1.**  $^1\text{H}$  NMR spectra of BLG26.

**Figure S2.**  $^{13}\text{C}$  NMR spectra of BLG26.

**Figure S3.** HRESIMS spectra of BLG26.

**Figure S4.** HPLC spectra of BLG26.

**Figure S5.** BLG26 displays anti-proliferative activity against SMMC-7721, PANC-1 and HCT116 cells. (A) BLG26 suppresses the growth of SMMC-7721 cells at 48 h. (B) BLG26 suppresses the growth of HCT116 cells at 48 h. (C) BLG26 suppresses the growth of PANC-1 cells at 48 h.

**Figure S6.** BLG26 can get into AGS and HGC27 cells. (A) Excitation spectrum of BLG26. (B) Emission spectrum of BLG26. (C) Treated AGS cells and HGC27 cells showed fluorescence.

**Figure S1.**

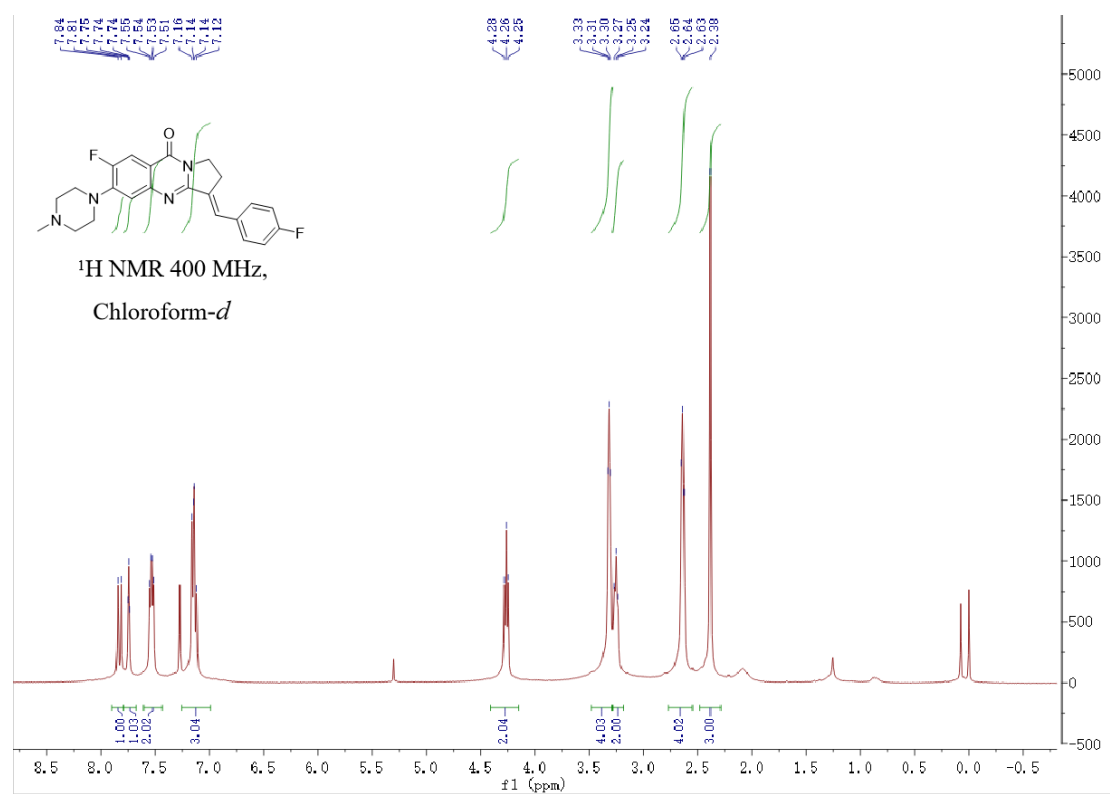

**Figure S2.**

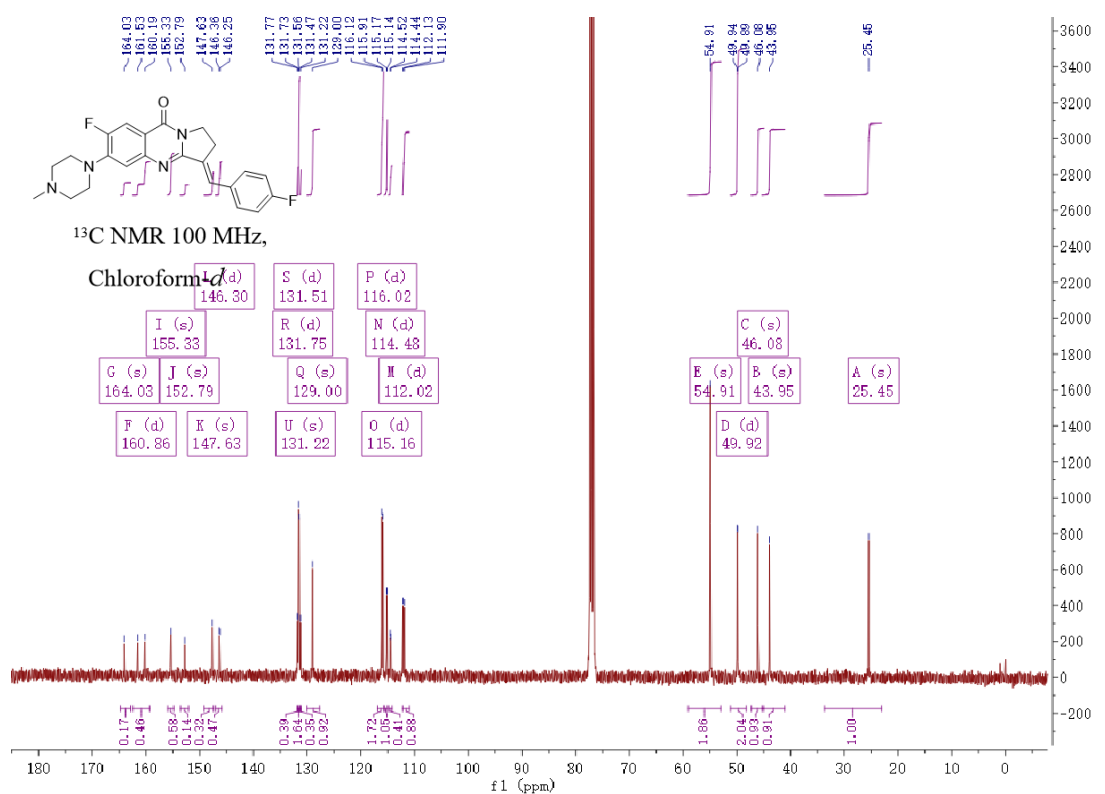

# Generic Display Report

---

|                      |                                                      |                  |                       |
|----------------------|------------------------------------------------------|------------------|-----------------------|
| <b>Analysis Info</b> |                                                      | Acquisition Date | 5/19/2021 12:16:45 PM |
| Analysis Name        | D:\Data\yangy\new\YANGCHENGJIE210519_5_11_01_39353.d |                  |                       |
| Method               | POS_100-1200_For LC.m                                | Operator         | LZU                   |
| Sample Name          | YANGCHENGJIE210519_5                                 | Instrument       | micrOTOF              |
| Comment              |                                                      |                  |                       |

---

Mass spectrum plot showing intensity (x10<sup>6</sup>) versus m/z. The x-axis ranges from 100 to 800 m/z. The y-axis ranges from 0.0 to 1.5 x10<sup>6</sup>. A major peak is labeled at m/z 409.1659. A minor peak is labeled at m/z 205.0996. The plot is titled "+MS, 0.1-0.9min #8-51, -Peak Bkgrnd".

| m/z      | Intensity (x10 <sup>6</sup> ) |
|----------|-------------------------------|
| 205.0996 | ~0.1                          |
| 409.1659 | ~1.6                          |

---

|                                 |                               |         |             |
|---------------------------------|-------------------------------|---------|-------------|
| Bruker Compass DataAnalysis 4.1 | printed: 5/19/2021 3:48:13 PM | by: LZU | Page 1 of 1 |
|---------------------------------|-------------------------------|---------|-------------|

**Figure S4.**

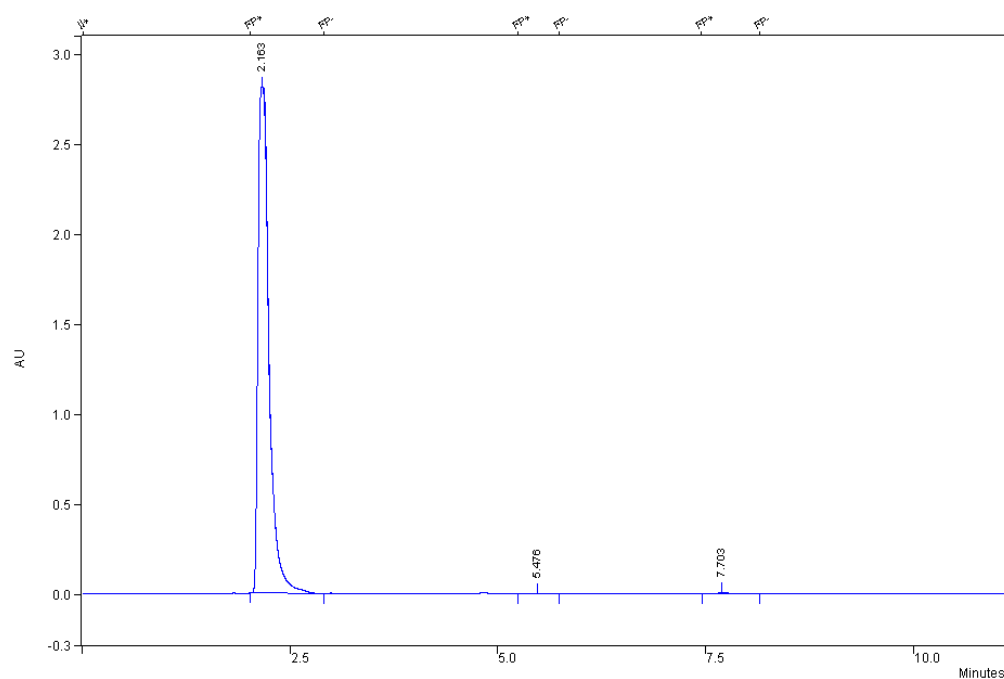

| Peak No. | Peak Name | Result ( ) | Ret. Time (min) | Time Offset (min) | Area (counts) | Sep. Code | Width 1/2 (sec) | Status Codes |
|----------|-----------|------------|-----------------|-------------------|---------------|-----------|-----------------|--------------|
| 1        |           | 99.5622    | 2.163           | 0.000             | 260839888     | BB        | 7.9             |              |
| 2        |           | 0.1514     | 5.476           | 0.000             | 396529        | BB        | 12.2            |              |
| 3        |           | 0.2864     | 7.703           | 0.000             | 750338        | BB        | 15.1            |              |
| Totals:  |           | 100.0000   |                 | 0.000             | 261986755     |           |                 |              |

**Figure S5.**

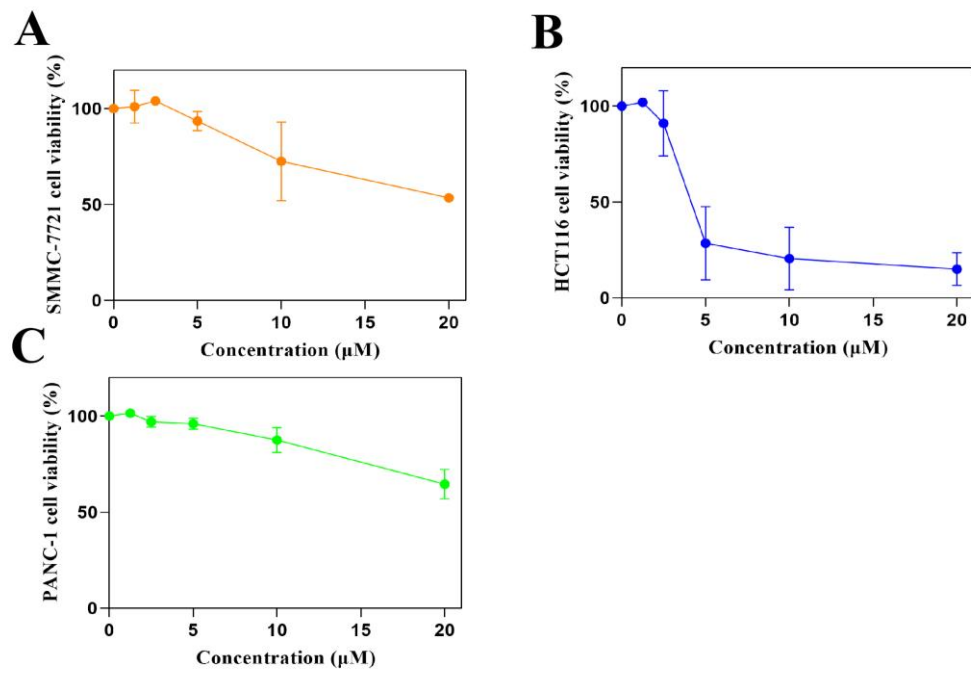



**Figure S6.**

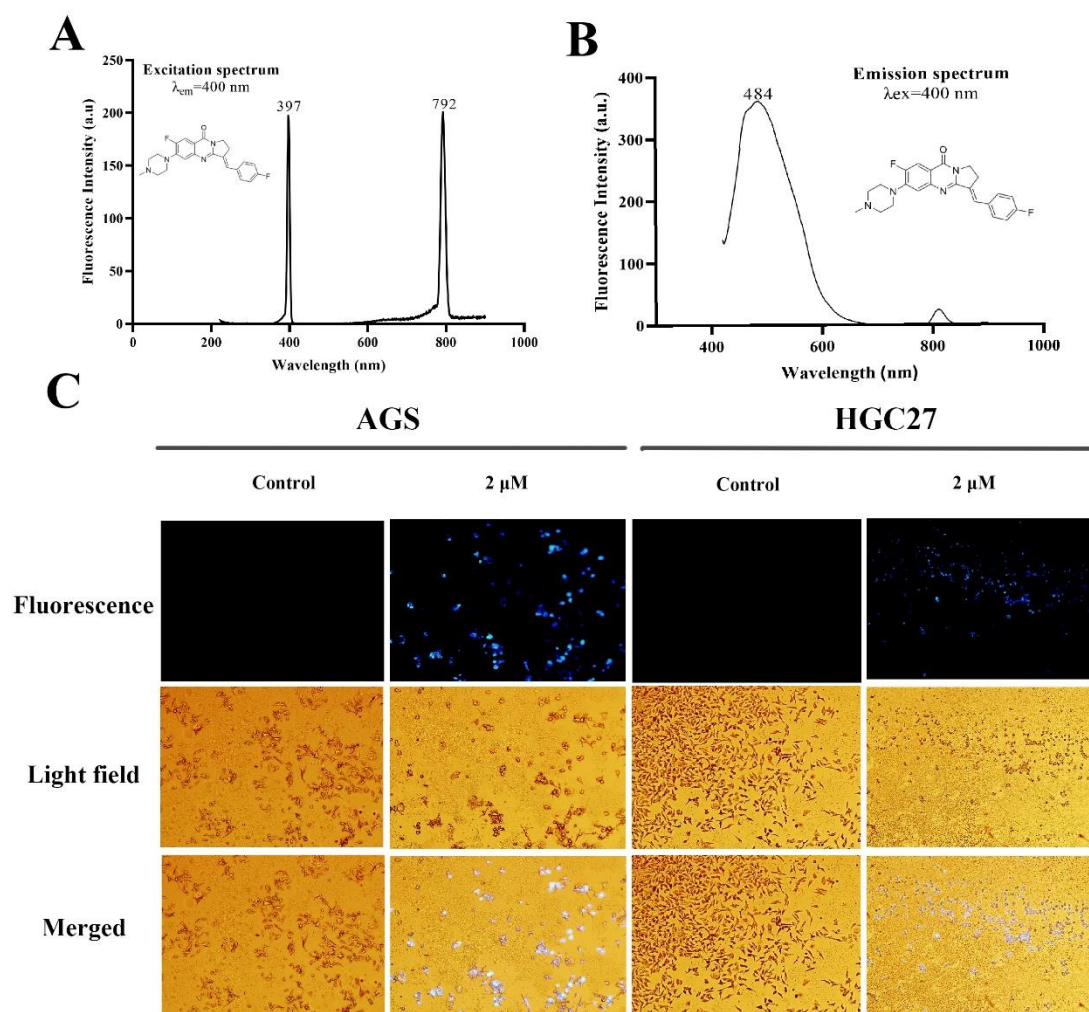

Supplement: s1 [file s1]
